# Supplementary material
Source: Research Square preprint supplement (doi:10.21203/rs.3.rs-9645371/v1)
Supplement: Supplementary file 1 [file 9b8f620600109e9e1ef9fbcf.docx]

**APPENDIX A**

**CONSENT FORM**

**Research Project:** D**evelopment and standardization of Socioeconomic Status Scale for Rural Women Farmers in Southwest, Nigeria**

**Name of Investigator:** Oluwafunmilola O. Olayode

**Department of Agricultural Extension and Rural Development,**

**University of Ilorin, Ilorin, Kwara State.**

I confirmed that I have read and understand the information on the paper for the above study, I have had the opportunity to consider the information, ask questions and have had these answered satisfactorily

I understand that my participation is voluntary and that I am free to withdraw at any time without giving reason.

I understand that any information given by me maybe used in future reports, articles or presentations by the researcher.

I understand that my name will not appear in any reports, articles or presentation

I agree to take part in the above study

_____________________ _________________ ___________

Name of Participant Date Signature

_____________________ __________________ ____________

Name of Researcher Date Signature

**Questionnaire**

**SECTION A**

**Personal Characteristics**

Please tick as appropriate

Local Government Area: ………………….

- 1. Age: ………………..years
  2. Religion: (i) Christian ( ), (ii) Islam ( ), (iii) Traditional ( ).
  3. Marital Status: (i) Single ( ),(ii) Married ( ), (iii) Divorced ( ), (iv) Separated ( ),

(v) Widowed ( ).

- 1. Years of Farming experience: ……………… years
  2. Farming Status: Part time ( ), Full time ( )
  3. Is farming your major occupation? Yes ( ), No ( )
  4. If yes, do you engage in other occupation? Yes ( ), No ( )
  5. Secondary occupation: (i) Farming ( ), (ii) Civil Service ( ), (iii) Trading ( ), (iv) Artisan ( ),

Others (pls, specify)………………………………..

- 1. Type of agricultural production: (i) Food Crop production ( ), (ii) Cash Crop production (iii)Fish production ( ), (iv) Livestock production ( )

**SECTION B**

**Cosmopoliteness**

- 1. Have you ever travelled out of your community? Yes ( ), No( )
  2. If Yes, please indicate the places you have visited by ticking

| Places you have visited | Daily | Weekly | Fortnightly | Monthly | Yearly |
| --- | --- | --- | --- | --- | --- |
| Within the Local Government |  |  |  |  |  |
| Other Local Governments in the State |  |  |  |  |  |
| Other States of the Federation |  |  |  |  |  |
| Other Countries |  |  |  |  |  |

- 1. Please, indicate your frequency of visit to the following places by ticking as appropriate

| S/N | Item | Daily | Weekly | Fortnightly | Monthly | Yearly |
| --- | --- | --- | --- | --- | --- | --- |
| 1 | How often do you visit veterinary/livestock officers? |  |  |  |  |  |
| 2 | How often do you visit extension officers? |  |  |  |  |  |
| 2 | Attend cooperative/ association meetings |  |  |  |  |  |
| 3 | Visit to veterinary clinic |  |  |  |  |  |
| 4 | Visit to LGA/ADP or other farmers to seek agricultural information |  |  |  |  |  |
| 5 | Village market |  |  |  |  |  |

**Leadership position**

- 1. What leadership position do you hold?
     1. No leadership position ( )
     2. Household leader ( )
     3. Religious leader ( )
     4. Association / society/ organization leader ( )
     5. Community leader ( )
     6. Traditional chief ( )

**SECTION C**

**Educational status**

- 1. Literacy: Can you read in English? Yes ( ), No ( ); Can you write in English? Yes ( ), No( ) Can you read your native dialect? Yes ( ),No ( )
  2. Number of Years spent in school: …………….. years
  3. Level of Formal Education: (i) No formal education ( ), (ii) Adult education ( ),

(iii) Arabic Education ( ), (iv) Primary Education ( ), (v) Junior Secondary Education ( ),

(v) Senior Secondary Education ( ), (vii) Tertiary Education ( ).

**Social Participation Name(s)**

Please, tick as appropriate

- 1. Do you belong to any social club? Yes ( ), No ( ) …………….
  2. Are you a member of cooperative society? Yes ( ), No ( ) ……………..
  3. Do you belong to any agricultural association? Yes ( ), No ( ) ……………..
  4. Are you a member of development association? Yes ( ), No ( ) ……………..
  5. Please indicate how often you engage in these social activities during the past 12 months

| S/N | Social activities | Not at all | 5 times this past year | Once a month or every 2 months | Once every 2-3 weeks | Once a week | More than once a week |
| --- | --- | --- | --- | --- | --- | --- | --- |
| 1. | Visits with friends at your/their home |  |  |  |  |  |  |
| 2. | Visits with relatives at your/their homes |  |  |  |  |  |  |
| 3. | Listened to music or watched television, videotapes or DVD with others |  |  |  |  |  |  |
| 4. | Went to services at worship place |  |  |  |  |  |  |
| 5. | Attended meeting of association/organization/ social club etc |  |  |  |  |  |  |
| 6. | Attended naming, wedding or burial ceremony |  |  |  |  |  |  |
| 7. | Do you travel to city |  |  |  |  |  |  |
| 8. | Participated in physical activities or exercise with others |  |  |  |  |  |  |
| 9. | Went to anniversaries, concerts, exhibitions with others |  |  |  |  |  |  |

- 1. **Cultural possession**

| S/N | Items | No. of items possessed | S/N | Items | No. of items possessed |
| --- | --- | --- | --- | --- | --- |
| 1 | Total number of children | 0 ( )  1-3( )  4-6( )  >6( ) | 2 | Total number of male children | 0 ( )  1( )  2( )  >2( ) |
| 3 | Total number of female children | 0 ( )  1( )  2( )  >2( ) | 4 | Total number of relatives that are living in the household | 0 ( )  1( )  2( )  >2( ) |
| 5 | Total household | 0 ( )  1-3( )  4-6( )  7-9( )  >9 | 6 | Children in nursery/primary school | 0 ( )  1( )  2( )  3( )  >3( ) |
| 9 | Children in secondary school | 0 ( )  1( )  2( )  >2( ) | 10 | Children in higher institution | 0 ( )  1( )  2( )  >2( ) |
| 11 | Children that are graduates | 0 ( )  1( )  2( )  >2( ) | 12 | Children that are married | 0 ( )  1( )  2( )  >2( ) |
| 13 | Children who are in civil service | 0 ( )  1( )  2( )  >2( ) | 14 | Children who are in other highly placed job | 0 ( )  1( )  2( )  >2( ) |
| 15 | Children who are abroad | 0 ( )  1( )  2( )  >2( ) | 16 | High position of parent (s) in society   1. Yes 2. No | ( )  ( ) |
| 17 | High position of husband in society   1. Yes 2. No | ( )  ( ) | 18 | High position of inlaw in society   1. Yes 2. No | ( )  ( ) |
| 19 | Ownership of house in this village | 0 ( )  1( )  2( )  >2( ) | 20 | Ownership of house in other villages | 0 ( )  1( )  2( )  >2( ) |
| 21 | Ownership of house in the city | 0 ( )  1( )  2( )  >2( ) | 22 | Type of building   1. Mud house (bungalow) 2. Mud house (storey building) 3. Block house (bungalow) 4. Block house (storey building) | ( )  ( )  ( )  ( ) |
| 23 | Floor types.   1. Mud floor 2. Dung painted floor 3. Cemented floor 4. Tiled floor | ( )  ( )  ( )  ( ) | 24 | Earthen pot   1. Yes 2. No | ( )  ( ) |
| 25 | Number of traditional attires | 0( )  1( )  2( )  >2( ) | 26 | Sources of cooking   1. Firewood 2. Charcoal 3. Kerosene stove 4. Electric cooker 5. Gas cooker | ( )  ( )  ( )  ( )  ( ) |
| 27 | Bathroom type   1. Household 2. Communal | ( )  ( ) | 28 | Ceiling types   1. Earthen 2. Porcelain | ( )  ( ) |
| 29 | Toilet type   1. Bush 2. Bucket toilet 3. Pit toilet 4. Water cistern | ( )  ( )  ( )  ( ) | 30 | Sources of drinking water   1. Personal bore hole 2. Communal bore hole 3. Personal well 4. Communal well 5. Spring water | ( )  ( )  ( )  ( )  ( ) |
| 31 | Chieftaincy title   1. Yes 2. No | ( )  ( ) | 32 | Pairs of shoe | 1( )  2( )  >2( ) |
| 33 | Roofing material types   1. Thatched 2. Aluminium 3. Fibre britment 4. Stone coated 5. Swiss | ( )  ( )  ( )  ( )  ( ) | 34 | Fenced compound   1. Yes 2. No | ( )  ( ) |

**26. Material possession**

| S/N | Item | No. of item possessed | S/N | Item | No. of item possessed |
| --- | --- | --- | --- | --- | --- |
| 34 | Cutlasses | 1-3 ( )  4-6 ( )  >6( ) | 35 | Axe   1. Yes 2. No | ( )  ( ) |
| 36 | Hoe   1. Yes 2. No | ( )  ( ) | 37 | Knife   1. Yes 2. No | ( )  ( ) |
| 38 | Wall clock   1. Yes 2. No | ( )  ( ) | 39 | Wrist watch   1. Yes 2. No | ( )  ( ) |
| 40 | Necklace / Beads   1. Yes 2. No | ( )  ( ) | 41 | Earring   1. Yes 2. No | ( )  ( ) |
| 42 | Framed photograph | 0 ( )  1 ( )  2 ( )  >2( ) | 43 | Bed types   1. Bamboo 2. Plank 3. Furniture 4. Iron | ( )  ( )  ( )  ( ) |
| 44 | Bicycle   1. Yes 2. No | ( )  ( ) | 45 | Motor cycle   1. Yes 2. No | ( )  ( ) |
| 46 | Car   1. Yes 2. No | ( )  ( ) | 47 | Mobile phone   1. Yes 2. No | ( )  ( ) |
| 48 | Transistor radio   1. Yes 2. No | ( )  ( ) | 49 | Cassette player   1. Yes 2. No | ( )  ( ) |
| 50 | Television set   1. Yes 2. No | ( )  ( ) | 51 | DVD/VCD   1. Yes 2. No | ( )  ( ) |
| 52 | Ceiling/Standing/ Table fan   1. Yes 2. No | ( )  ( ) | 53 | Raincoat   1. Yes 2. No | ( )  ( ) |
| 54 | Umbrella | 0 ( )  1 ( )  2 ( )  >2( ) | 55 | Torch light/ lamp   1. Yes 2. No | ( )  ( ) |
| 56 | Kettles | 0 ( )  1 ( )  2 ( )  >2( ) | 57 | Sources of light (Power)   1. Solar 2. Generator set 3. Electricity 4. Lantern 5. Lamp 6. Candle 7. Jango | ( )  ( )  ( )  ( )  ( )  ( )  ( ) |
| 58 | Metal buckets | 0 ( )  1 ( )  2 ( )  >2( ) | 59 | Plastic buckets | 0 ( )  1 ( )  2 ( )  >2( ) |
| 60. | Calabash | 0 ( )  1 ( )  2 ( )  >2( ) | 61. | Metal spoon | 1-3 ( )  4-6 ( )  >6( ) |
| 62 | Metal plate | 0 ( )  1-3 ( )  4-6 ( )  >6( ) | 63 | Breakable plate | 0 ( )  1 ( )  2 ( )  >2( ) |
| 64 | Unbreakable plate | 0 ( )  1 ( )  2 ( )  >2( ) | 65 | Metal cup | 0 ( )  1-3 ( )  4-6 ( )  >6( ) |
| 66 | Breakable cup | 0 ( )  1 ( )  2 ( )  >2( ) | 67 | Floor mat | 1-3 ( )  4-6 ( )  >6( ) |
| 68 | Ladder   1. Yes 2. No | ( )  ( ) | 69 | Wall hanger/ rack   1. Yes 2. No | ( )  ( ) |
| 70 | Water bottle   1. Yes 2. No | ( )  ( ) | 71 | Travelling bag   1. Yes 2. No | ( )  ( ) |
| 72 | Grinding stone   1. Yes 2. No | ( )  ( ) | 73 | Coal/ stove/ electric/steam iron   1. Yes 2. No | ( )  ( ) |
| 74 | Hand fan | 0 ( )  1 ( )  2 ( )  >2( ) | 75 | Comb | 0 ( )  1 ( )  2 ( )  >2( ) |
| 76 | Frying pan   1. Yes 2. No | ( )  ( ) | 77 | Dining table/chair   1. Yes 2. No | ( )  ( ) |
| 78 | Curtained parlor   1. Yes 2. No | ( )  ( ) | 79 | Standing mirror   1. Yes 2. No | ( )  ( ) |
| 80 | Wardrobe   1. Yes 2. No | ( )  ( ) | 81 | Wheel barrow   1. Yes 2. No | ( )  ( ) |
| 82 | Executive/cushion chair   1. Yes 2. No | ( )  ( ) | 83 | Turntable/ Speaker   1. Yes 2. No | ( )  ( ) |
| 84 | Spade/Shovel   1. Yes 2. No | ( )  ( ) | 85 | Knapsack sprayer   1. Yes 2. No | ( )  ( ) |
| 86 | Cable TV (DSTV, GOTV, Startimes, FreeTV, etc.)   1. Yes 2. No | ( )  ( ) | 87 | Weavon/wig cap   1. Yes 2. No | ( )  ( )  2 ( )  >2( ) |
| 88 | Headgear   1. Yes 2. No | 0 ( )  1 ( )  2 ( )  >2( ) | 89 | Scarf/ Turban caps   1. Yes 2. No | 0 ( )  1 ( )  2 ( )  >2( ) |
| 90 | Hand bag/ Purse | 0 ( )  1 ( )  2 ( )  >2( ) | 91 | Makeup Accessories   1. Yes 2. No | ( )  ( ) |

- 1. **Economic possession**

| S/N | Item | No. of item possessed | S/N | Item | No. of item possessed |
| --- | --- | --- | --- | --- | --- |
| 92 | Ownership of commercial vehicle   1. Yes 2. No | ( )  ( ) | 93 | Farm size  <1 acre  1-2acre  3-4acre  >1 hactare | ( )  ( )  ( )  ( ) |
| 94 | Plot of land owned inside the village   1. Yes 2. No | ( )  ( ) | 95 | Plot of land owned outside the village   1. Yes 2. No | ( )  ( ) |
| 96 | Hired labourer   1. Yes 2. No | ( )  ( ) | 97 | Cassava grating machine   1. Yes 2. No | ( )  ( ) |
| 98 | Rice milling machine   1. Yes 2. No | ( )  ( ) | 99 | Grains grinding machine   1. Yes 2. No | ( )  ( ) |
| 100 | Pepper Grinding machine   1. Yes 2. No | ( )  ( ) | 101 | Granaries /Silos   1. Yes 2. No | ( )  ( ) |
| 102 | Yam barn   1. Yes 2. No | ( )  ( ) | 103 | Snail | <10( )  10-19( )  20-29( )  ≥30( ) |
| 104 | Pigs | <10( )  10-19( )  20-29( )  ≥30( ) | 105 | Sheep | <10( )  10-19( )  20-29( )  ≥30( ) |
| 106 | poultry | <10( )  10-19( )  20-29( )  ≥30( ) | 107 | Goat | <10( )  10-19( )  20-29( )  ≥30( ) |
| 108 | Rabbit | <10( )  10-19( )  20-29( )  ≥30( ) | 109 | Snail shed | 1-3 ( )  4-6( )  >6( ) |
| 110 | Concrete pond | 1-3 ( )  4-6( )  >6( ) | 111 | Poultry pen | 1-3 ( )  4-6( )  >6( ) |
| 112 | Pig pen | 1-3 ( )  4-6( )  >6( ) | 113 | Goat pen | 1-3 ( )  4-6( )  >6( ) |
| 114 | Sheep house | 1-3 ( )  4-6( )  >6( ) | 115 | Tractor   1. Yes 2. No | ( )  ( ) |
| 116 | Plough   1. Yes 2. No | ( )  ( ) | 117 | Harrow   1. Yes 2. No | ( )  ( ) |
| 118 | Broadcast Spreader   1. Yes 2. No | ( )  ( ) | 119 | Harvester   1. Yes 2. No | ( )  ( ) |

1. **Women’s accessibility to Productive resources**

Please, indicate your access to the following items

| **S/N** | **Productive resources** |  | **S/N** | **Productive resources** |  |
| --- | --- | --- | --- | --- | --- |
| 120 | Labour   1. Hired labour 2. Family labour | ( )  ( ) | 121 | Land   1. Outright purchase 2. Inherited(Parents) 3. Inherited (Husband) 4. Rented | ( )  ( )  ( )  ( ) |
| 122 | Good water   1. Yes 2. No | ( )  ( ) | 1231 | ICT   1. Charging of handset 2. Airtime purchase 3. Data purchase 4. Call making 5. Text message 6. Installation of useful applications 7. Use of whatsapp 8. Use of facebook | ( )  ( )  ( )  ( )  ( )  ( )  ( )  ( )  ( ) |
| 124 | Vaccines   1. Yes 2. No | ( )  ( ) | 125 | Credit facility   1. Yes 2. No | ( )  ( ) |
| 126 | Extension services   1. Yes 2. No | ( )  ( ) | 127 | Conventional feeds   1. Yes 2. No | ( )  ( ) |
| 128 | Agricultural input   1. Fertilizer 2. Insecticides 3. Herbicides 4. Improved seeds | ( )  ( )  ( )  ( ) | 129 | Improved farming technologies   1. Yes 2. No | ( )  ( ) |

**SECTION D**

28. **Adoption of recommended practices**

Please, tick as appropriate, any response category to the adoption of these recommended practices

| S/N | Innovation | Not aware | Aware | Aware and taught | Tried | Adopted and Using |
| --- | --- | --- | --- | --- | --- | --- |
| A | **Livestock** |  |  |  |  |  |
| 1. | Improved breeds |  |  |  |  |  |
| 2. | Modern rearing methods |  |  |  |  |  |
| 3. | Improved housing |  |  |  |  |  |
| 4. | Feeding balanced ration |  |  |  |  |  |
| 5. | Ration supplied according to age, state of health and expected role and end-use of livestock on farm |  |  |  |  |  |
| 6. | Use of feed additives such as vitamins and salt lick |  |  |  |  |  |
| 7. | Artificial heating devices during cold spells |  |  |  |  |  |
| 8. | Artificial ventilation during hot periods |  |  |  |  |  |
| 9. | Sprays and dips for control of ectoparasites |  |  |  |  |  |
| 10. | Routine vaccination, Inoculation and other veterinary attention |  |  |  |  |  |
| 11. | Regular sanitation and disinfestations of farms |  |  |  |  |  |
| 12. | Deworming and de-ticking of farm animals |  |  |  |  |  |
| 13. | Debeaking, despuring or nail clipping |  |  |  |  |  |
| 14. | Dehorning and hoof trimming |  |  |  |  |  |
| 15. | Detection and isolationof sick animals in sick bays for disease control |  |  |  |  |  |
| 16. | Improved castration method |  |  |  |  |  |
| 17. | Improved slaughter and processing methods |  |  |  |  |  |
| B. | **Crop (Conservation Agriculture)** |  |  |  |  |  |
| 1. | Minimum soil disturbance |  |  |  |  |  |
| A | Reduced tillage and crop residue retention |  |  |  |  |  |
| B | Proper application of cultivar choice |  |  |  |  |  |
| C | Timely planting date |  |  |  |  |  |
| D | Increased planting density |  |  |  |  |  |
| E | Irrigation management |  |  |  |  |  |
| 2. | The use of crop biomass for permanent cover of soil |  |  |  |  |  |
| A | Use of cover crop and crop residue to manage pest and weed infestation |  |  |  |  |  |
| B | Fertilizer application |  |  |  |  |  |
| C | Proper sanitation by preventing weed seed movement by mechanical or human means |  |  |  |  |  |
| 3. | Sequential rotation practice for different unrelated crops |  |  |  |  |  |
| A | Use of mixed cropping |  |  |  |  |  |
| B | Use of crop rotation |  |  |  |  |  |
| C | Use of narrow rows i.e row spacing manipulation |  |  |  |  |  |

**29. Attitude to recommended practices**

Please, tick as appropriate, any response category to your level of agreement with the statements on new practices in crop production and animal husbandry. The scale is coded as SA- Strongly Agree, A-Agree, D-Disagree, SD-Strongly Disagree and U-Undecided.

| S/N | Item | SA | A | D | SD | U |
| --- | --- | --- | --- | --- | --- | --- |
| 1 | Conservation agriculture has been proven as the best  approach for sustainable crop production |  |  |  |  |  |
| 2 | I choose varieties that can be planted or harvested early while still achieving a full yield in order to avoid pests. |  |  |  |  |  |
| 3 | I use crop rotation and mixed cropping to manage animal and crop pests on my farm |  |  |  |  |  |
| 4 | Cover crops and crop residues are mostly beneficial for breaking pest cycles and enhance the effectiveness of the natural enemies |  |  |  |  |  |
| 5 | Fertility practices that replenish and maintain high soil organic matter provide an environment that enhances plant health |  |  |  |  |  |
| 6 | Late-season or early-season pest problems may be avoided by planting shorter season varieties |  |  |  |  |  |
| 7 | Crop cultivars can be made resistant to insect pests because of specific resistant genes that are incorporated during breeding |  |  |  |  |  |
| 8 | Conservation agriculture increases dependence on herbicides for weed management |  |  |  |  |  |
| 9 | It slows soil warming especially on poorly drained soils |  |  |  |  |  |
| 10 | The main yield limiting factor for conservation agriculture is pest problems so it is not economical |  |  |  |  |  |
| 11 | Modern rearing methods should be encouraged in animal husbandry |  |  |  |  |  |
| 12 | Improved breeds gives high productivity of animals |  |  |  |  |  |
| 13 | Feed supplements enhances weight gain, meat and egg production of my animals |  |  |  |  |  |
| 14 | Use of veterinary drugs has helped in improving animal health, weight and in producing egg, and meat |  |  |  |  |  |
| 15 | Animal production problems can be solved through new methods of animal husbandry |  |  |  |  |  |
| 16 | Veterinary services are so expensive |  |  |  |  |  |
| 17 | Government does not provide the needed support in passing new information to the animal husbandmen. |  |  |  |  |  |
| 18 | Modern methods of livestock production are meant for rich and educated farmers |  |  |  |  |  |
| 19 | Inadequate and Inaccessible veterinary staff/services |  |  |  |  |  |
| 20 | Dissemination of new and improved practices to farmers is being politicized and its not encouraging agricultural production. |  |  |  |  |  |

**SECTION E**

**30. Type of farming activities**

Please, tick as appropriate, any response category to the type of farming activities you are involved in.

| **Farming type** | Yes | No |
| --- | --- | --- |
| Food Crop production |  |  |
| Cash Crop Production |  |  |
| Livestock production |  |  |
| Poultry production |  |  |
| Fish farming |  |  |

1. **Women involvement in various agricultural activities**

Please, tick as appropriate, any response category to the level of your involvement in the following agricultural activities.

| **Agricultural activities** | **Involvement** | | **Level of Involvement** | | |
| --- | --- | --- | --- | --- | --- |
|  | Yes | No | Frequently | Occasionally | Not at all |
| **Crop production** |  |  |  |  |  |
| Land clearing |  |  |  |  |  |
| Sewing/ Planting |  |  |  |  |  |
| Weeding |  |  |  |  |  |
| Pruning |  |  |  |  |  |
| Use of herbicide |  |  |  |  |  |
| Harvesting |  |  |  |  |  |
| Processing |  |  |  |  |  |
| Marketing |  |  |  |  |  |
| Storage |  |  |  |  |  |
| **Livestock production** |  |  |  |  |  |
| Cleaning of animals and sheds |  |  |  |  |  |
| Making of feed concentrate |  |  |  |  |  |
| Watering of animals |  |  |  |  |  |
| Fodder collection |  |  |  |  |  |
| Milking of animals |  |  |  |  |  |
| Preparing and storing of dung cake |  |  |  |  |  |
| Collection of farm yard manure |  |  |  |  |  |
| Caring for sick/diseased animals |  |  |  |  |  |
| **Poultry production** |  |  |  |  |  |
| Procurement of chicks |  |  |  |  |  |
| Procurement of inputs(feeds and drugs) |  |  |  |  |  |
| Provision of water |  |  |  |  |  |
| Cleaning of poultry pens |  |  |  |  |  |
| Feeding of birds |  |  |  |  |  |
| Vaccination of birds |  |  |  |  |  |
| Administration of drugs |  |  |  |  |  |
| Debeaking of birds |  |  |  |  |  |
| Sorting of eggs |  |  |  |  |  |
| Culling of sick/diseased birds |  |  |  |  |  |
| Sales of eggs |  |  |  |  |  |
| Sales of chicken |  |  |  |  |  |
| Record keeping |  |  |  |  |  |
| **Fish farming** |  |  |  |  |  |
| Feed formulation |  |  |  |  |  |
| Changing of water |  |  |  |  |  |
| Cleaning |  |  |  |  |  |
| Pond construction |  |  |  |  |  |
| Spawning |  |  |  |  |  |
| Medication |  |  |  |  |  |
| Checking of water quality |  |  |  |  |  |
| Sampling |  |  |  |  |  |
| Stocking |  |  |  |  |  |
| Feeding |  |  |  |  |  |
| Harvesting |  |  |  |  |  |
| Weighing |  |  |  |  |  |
| Marketing |  |  |  |  |  |
| Record keeping |  |  |  |  |  |

1. **Level of women’s involvement in farm decision-making**

Please, tick as appropriate, any response category to your involvement in decision making in the following agricultural activities.

| **Decision making in** | Frequently | Occasionally | Rarely |
| --- | --- | --- | --- |
| Size of stock/herd |  |  |  |
| Sales of farm produce |  |  |  |
| Selection of what to produce |  |  |  |
| System of rearing |  |  |  |
| Procurement of vaccines |  |  |  |
| Procurement of feeds |  |  |  |
| Procurement of birds |  |  |  |
| Veterinary services |  |  |  |
| Marketing of produce |  |  |  |
| Keeping of earning |  |  |  |

1. Women’s involvement in Unpaid Agricultural Labor
2. Do you currently have children under the age of five? Yes ( ) No( )
3. On average, how many hours per day do you spend on core agricultural tasks (weeding, harvesting, food processing)? ____________ hours
4. How much time do you spend caring for children while working on the farm each day?_________ hours
5. How many hours per day do you spend collecting firewood and water? _______ hours
6. Please, tick as appropriate, any response category to the statements below

The scale is coded as SA- Strongly Agree, A-Agree, D-Disagree, SD-Strongly Disagree and U-Undecided.

| S/N | Item | SA | A | D | SD | U |
| --- | --- | --- | --- | --- | --- | --- |
| 1 | I often perform multiple tasks at the same time (e.g., childcare while farming) |  |  |  |  |  |
| 2 | My agricultural work is mostly unpaid |  |  |  |  |  |
| 3 | Unpaid agricultural labor limits my ability to earn income, pursue education, or participate in community decision-making |  |  |  |  |  |
| 4 | Agricultural workload affect my health and wellbeing (e.g., fatigue, stress) |  |  |  |  |  |
| 5 | I have access to labor-saving technologies (e.g., irrigation pumps, food processing tools) |  |  |  |  |  |
| 6 | Support such as childcare, technology, or policy recognition would reduce my burden of unpaid labor |  |  |  |  |  |
