# Supplementary material
Source: Research Square preprint supplement (doi:10.21203/rs.3.rs-9645371/v1)
Supplement: Supplementary file 2 [file c24e5de7810191ad574e7655.docx]

**Table S1: SES Scale for Rural Women Farmers in Southwest, Nigeria**

| **Item** | **Statistical tool** | **Discrimination index** | **Response categories** | **Standard scores** |
| --- | --- | --- | --- | --- |
| Bathroom type | t | 8.49 | Communal  Household | 6  3 |
| Bed types | ″ | 5.23 | No  Bamboo  Plank  Furniture  Iron | 1  2  2  5  12 |
| Breakable plate | ″ | 16.65 | 0  1  2  >2 | 1  2  3  5 |
| Building type | ″ | 13.85 | Mud bungalow  Mud storey  Block bungalow  Block storey | 2  4  5  8 |
| Calabash | ″ | 5.4 | 0  1  2  >2 | 5  5  6  7 |
| Ceiling type | ″ | 6.76 | No  Sack/cement paper  Wooden  Asbestos  PVC  POP | 0  1  3  6  9  12 |
| Children who are graduates | ″ | 5.79 | 0  1  2  >2 | 3  5  6  7 |
| Children who are married | ″ | 11.17 | 0  1  2  >2 | 3  5  6  7 |
| Comb | ″ | 19.82 | 0  1  2  >2 | 1  2  4  6 |
| Cutlasses | ″ | 20.3 | 0  1-3  4-6  >6 | 0  3  5  7 |
| Farm size | t | 18.68 | <1 acre  1-2acres  3-4acres  >1hectares | 2  3  4  6 |
| Floor mat | ″ | 5.29 | 0  1-3  4-6  >6 | 1  4  7  8 |
| Floor -type | ″ | 16.47 | Mud  Dung painted  Cement  Tiled | 2  4  5  9 |
| Framed photograph of oneself | ″ | 8.29 | 0  1  2  >2 | 2  4  5  7 |
| Glass cup | t | 20.95 | 0  1  2  >2 | 1  3  4  5 |
| Hand fan | ″ | 11.82 | 0  1  2  >2 | 2  4  5  7 |
| Handbag | ″ | 15.6 | 0  1  2  >2 | 0  2  3  5 |
| Headgear | ″ | 13.05 | 0  1  2  >2 | 2  3  4  6 |
| Household size | ″ | 6.48 | 0  1-3  4-6  7-9  >9 | 0  2  3  5  7 |
| Kettle | ″ | 13.06 | 0  1  2  >2 | 2  4  6  8 |
| Metal bucket | ″ | 5.53 | 0  1  2  >2 | 2  4  6  7 |
| Metal cup | ″ | 16.19 | 0  1-3  4-6  >6 | 2  4  5  6 |
| Metal plate | ″ | 12.17 | 0  1  2  >2 | -1  3  4  6 |
| Metal spoon | ″ | 19.05 | 0  1  2  >2 | 0  2  3  5 |
| Number of children | t | 6.57 | 0  1-3  4-6  >6 | 0  2  5  7 |
| Number of female children | t | 8.52 | 0  1  2  >2 | 1  3  4  6 |
| Number of male children | t | 9.91 | 0  1  2  >2 | 1  2  4  6 |
| Pair of shoes | ″ | 9.05 | 0  1  2  >2 | 1  2  3  5 |
| Plastic bucket | ″ | 11.93 | 0  1  2  >2 | 1  2  3  6 |
| Plastic plate | ″ | 20.91 | 0  1-3  4-6  >6 | 2  4  6  7 |
| Roofing material types | ″ | 6.68 | Thatched  Aluminum  Fibre britment  Stone coated  Swiss | 1  4  7  12  12 |
| Scarf/turban cap | ″ | 16.3 | 0  1  2  >2 | 1  3  4  5 |
| Snail | t | 5.99 | 0  1-9  10-19  20-29  >29 | 3  6  7  7  8 |
| Toilet type | ″ | 20.56 | Bush  Bucket  Pit  Water cistern | 2  3  5  7 |
| Traditional attire | ″ | 9.82 | 0  1  2  >2 | 1  3  3  5 |
| Umbrella | ″ | 13.41 | 0  1  2  >2 | 2  4  5  8 |
| Unbreakable plate | ″ | 13.46 | 0  1  2  >2 | 1  2  3  5 |
| Weave-on/wig | ″ | 5.07 | 0  1  2  >2 | 2  4  5  7 |
| Visit to extension officers | rpbis | 9.08 | Once this year  Monthly  Fortnightly  Weekly  Daily | 1  2  4  7  12 |
| Visit to friends/ADP/LGA to seek agricultural information | ″ | 7.75 | Once this year  Monthly  Fortnightly  Weekly  Daily | 0  3  5  7  9 |
| Blender | rpbis | 0.403 | Yes  No | 7  2 |
| Cable TV(GOTV,DSTV, startimes etc) | ″ | 0.527 | Yes  No | 7  2 |
| Car | ″ | 0.539 | Yes  No | 7  4 |
| Utilization of Conventional feed | ″ | 0.406 | Yes  No | 6  3 |
| Cooking gas | ″ | 0.458 | Yes  No | 6  3 |
| Curtained parlour | ″ | 0.464 | Yes  No | 6  3 |
| Dining set | ″ | 0.513 | Yes  No | 5  3 |
| DVD/VCD player | ″ | 0.586 | Yes  No | 6  3 |
| Executive chair | ″ | 0.542 | Yes  No | 6  3 |
| Facebook | ″ | 0.489 | Yes  No | 6  3 |
| Frying pan | ″ | 0.411 | Yes  No | 5  2 |
| Generator set | ″ | 0.512 | Yes  No | 6  3 |
| High position of parents in society | ″ | 0.414 | Yes  No | 6  1 |
| Hired labour | ″ | 0.491 | Yes  No | 5  2 |
| Iron | ″ | 0.415 | Yes  No | 5  2 |
| Land purchase | ″ | 0.485 | Yes  No | 5  2 |
| Membership of a development Association | ″ | 0.512 | Yes  No | 5  2 |
| Mobile phone | ″ | 0.431 | Yes  No | 6  3 |
| Personal borehole | ″ | 0.404 | Yes  No | 7  2 |
| Radio | ″ | 0.46 | Yes  No | 5  4 |
| Speaker | ″ | 0.408 | Yes  No | 7  4 |
| Standing mirror | ″ | 0.455 | Yes  No | 5  0 |
| Table/ceiling fan | ″ | 0.513 | Yes  No | 5  3 |
| Television set | ″ | 0.528 | Yes  No | 5  3 |
| Wall clock | ″ | 0.484 | Yes  No | 5  2 |
| Wardrobe | ″ | 0.553 | Yes  No | 5  3 |
| Whatsapp usage | ″ | 0.491 | Yes  No | 6  3 |
